# Supplementary material
Source: PubMed Central journal article supplement (PMC8456504)

# Full-length blots

Figure 2

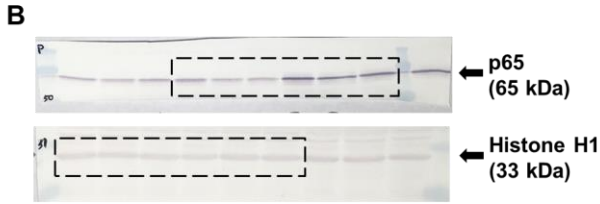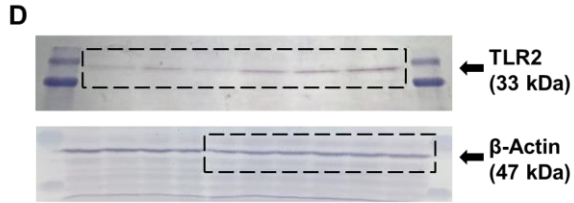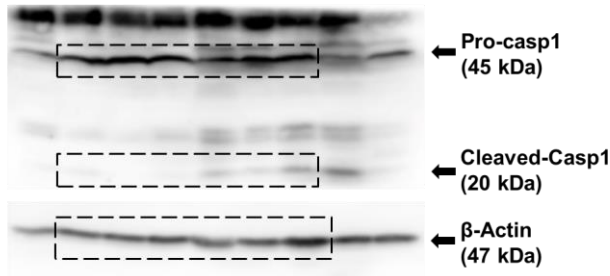

Figure 3

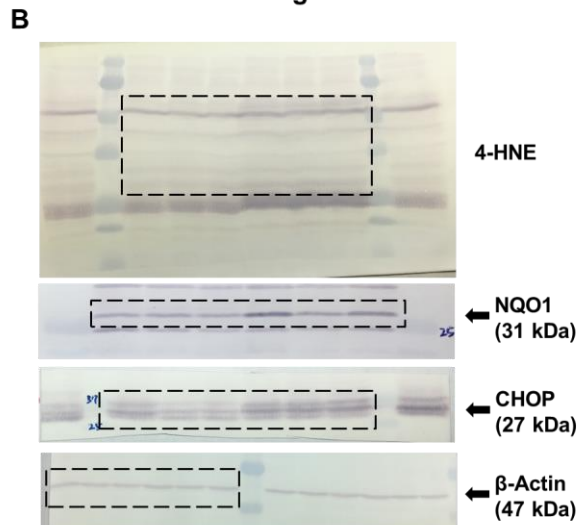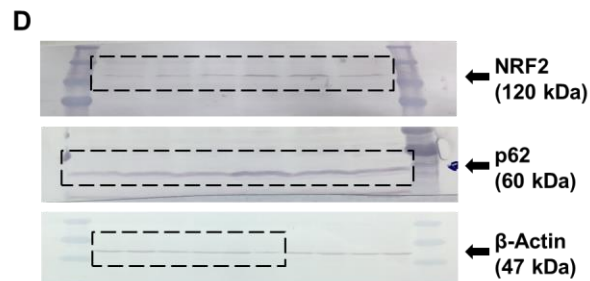

Figure 4

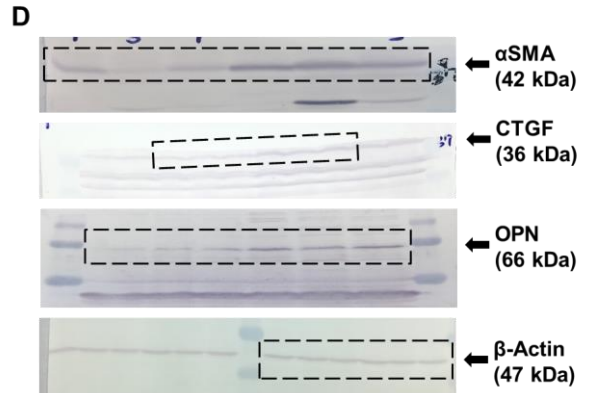

Figure 5

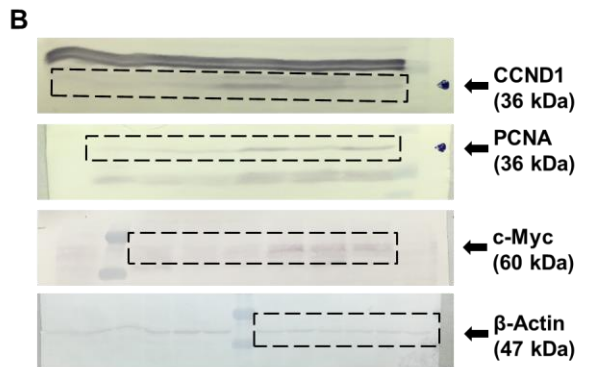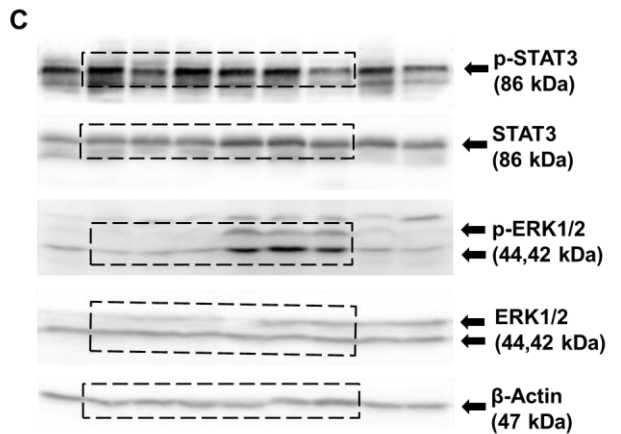

Figure 6

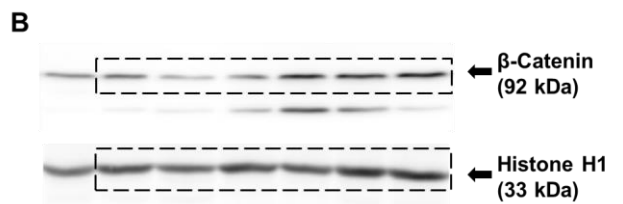

Figure S1

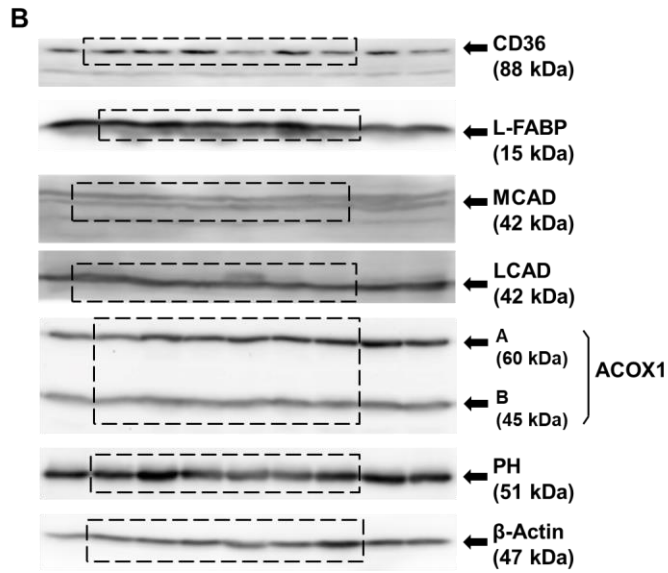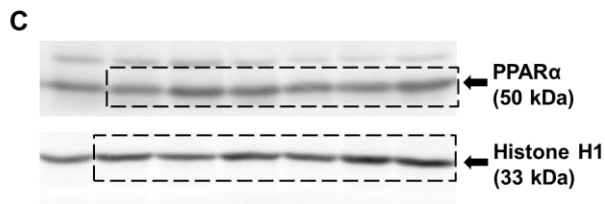

Figure S2

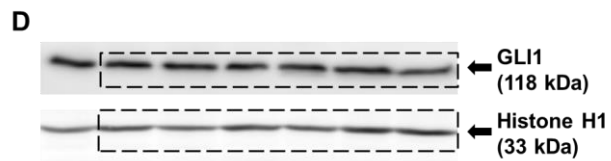

Supplement: bgz132_suppl_supplementary_material.pdf [file bgz132_suppl_supplementary_material.pdf]
